# Supplementary material for: Final results and overall survival data from a phase II study of acalabrutinib monotherapy in patients with relapsed/refractory mantle cell lymphoma, including those with poor prognostic factors
Source: PubMed Central journal article supplement — Haematologica. 2023 Jul 20;109(1):343–50. doi: 10.3324/haematol.2022.282469 (PMC10772531; doi:10.3324/haematol.2022.282469), 2023-07-20
Supplement: 2022_282469_LEGOUILL_SUPPL.pdf [file 2022_282469_LEGOUILL_SUPPL.pdf]

# Final results and overall survival data from a phase II study of acalabrutinib monotherapy in patients with relapsed/refractory mantle cell lymphoma, including those with poor prognostic factors

Steven Le Gouill,<sup>1</sup> Monika Długosz-Danecka,<sup>2</sup> Simon Rule,<sup>3,4</sup> Pier Luigi Zinzani,<sup>5,6</sup> Andre Goy,<sup>7</sup> Stephen D. Smith,<sup>8</sup> Jeanette K. Doorduijn,<sup>9</sup> Carlos Panizo,<sup>10</sup> Bijal D. Shah,<sup>11</sup> Andrew J. Davies,<sup>12</sup> Richard Eek,<sup>13</sup> Eric Jacobsen,<sup>14</sup> Arnon P. Kater,<sup>15</sup> Tadeusz Robak,<sup>16</sup> Preetesh Jain,<sup>17</sup> Roser Calvo,<sup>18</sup> Lin Tao<sup>19</sup> and Michael Wang<sup>17</sup>

<sup>1</sup>Institut Curie, Paris, France; <sup>2</sup>Maria Skłodowska-Curie National Research Institute of Oncology, Krakow, Poland; <sup>3</sup>Plymouth University Medical School, Plymouth, UK; <sup>4</sup>AstraZeneca, Mississauga, Ontario, Canada; <sup>5</sup>IRCCS Azienda Ospedaliero-Universitaria di Bologna Istituto di Ematologia “Seràgnoli”, Bologna, Italy; <sup>6</sup>Dipartimento di Medicina Specialistica, Diagnostica e Sperimentale Università di Bologna, Bologna, Italy; <sup>7</sup>John Theurer Cancer Center, Hackensack University Medical Center, Hackensack, NJ, USA; <sup>8</sup>University of Washington, Fred Hutchinson Cancer Center, Seattle, WA, USA; <sup>9</sup>Erasmus MC Cancer Institute, on behalf of the HOVON Lunenburg Lymphoma Phase I/II Consortium, Rotterdam, the Netherlands; <sup>10</sup>Hospital Universitario Donostia, San Sebastián, Spain; <sup>11</sup>Moffitt Cancer Center, Tampa, FL, USA; <sup>12</sup>NIHR/Cancer Research UK Experimental Cancer Medicines Center, University of Southampton, Faculty of Medicine, Southampton, UK; <sup>13</sup>Border Medical Oncology, Albury, New South Wales, Australia; <sup>14</sup>Dana Farber Cancer Institute, Harvard Medical School, Boston, MA, USA; <sup>15</sup>Amsterdam University Medical Center, on behalf of the HOVON Lunenburg Lymphoma Phase I/II Consortium, Amsterdam, the Netherlands; <sup>16</sup>Copernicus Memorial Hospital, Medical University of Lodz, Lodz, Poland; <sup>17</sup>MD Anderson Cancer Center, University of Texas, Houston, TX, USA; <sup>18</sup>AstraZeneca, Gaithersburg, MD, USA and <sup>19</sup>AstraZeneca, South San Francisco, CA, USA

Correspondence:

M. WANG - miwang@mdanderson.org

<https://doi.org/10.3324/haematol.2022.282469>

Received: December 5, 2022.

Accepted: July 7, 2023.

Early view: July 20, 2023.

©2024 Ferrata Storti Foundation

Published under a CC BY-NC license

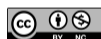

**Supplemental Figure 1.** Forest plot of overall response rates by subgroup.

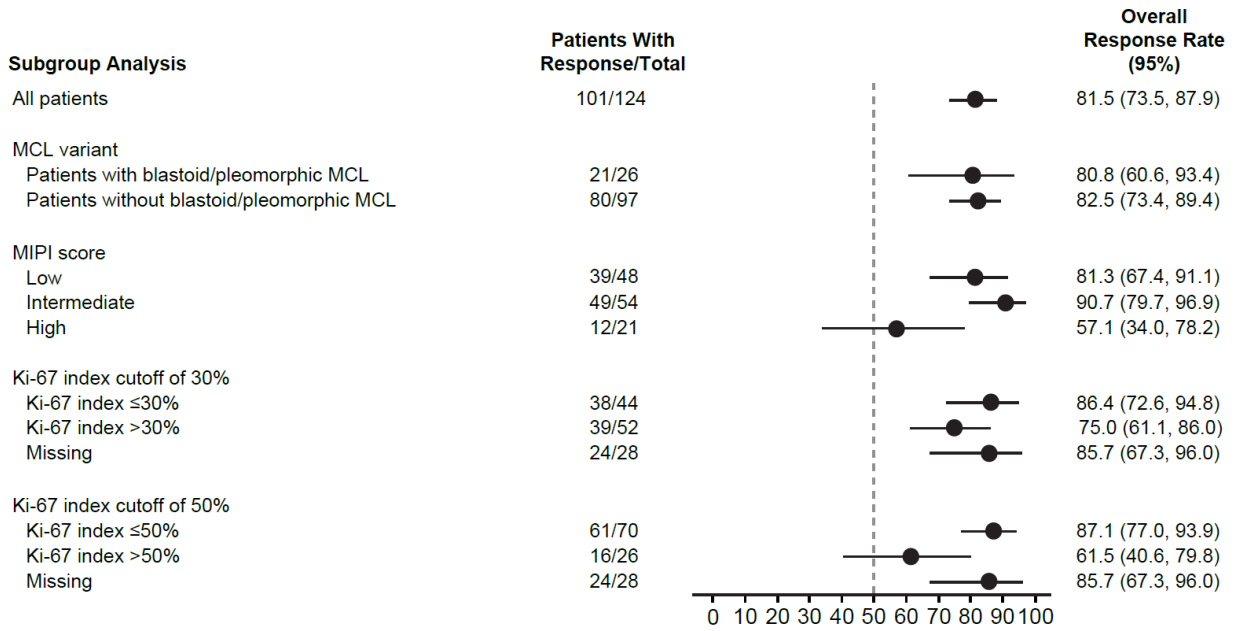

**Supplemental Table 1. Patient disposition**

|                                                              | <b>All Patients (N=124)</b> |
|--------------------------------------------------------------|-----------------------------|
| <b>Follow-up, median (range), months</b>                     | 38.1 (0.3–68.8)             |
| <b>Discontinued acalabrutinib, n (%)</b>                     |                             |
| Disease progression                                          | 77 (62.1)                   |
| AE                                                           | 15 (12.1)                   |
| Initiation of subsequent anticancer therapy                  | 6 (4.8)                     |
| Investigator's discretion not related to AE/SAE              | 3 (2.4)                     |
| Withdrawal of consent                                        | 2 (1.6)                     |
| Death                                                        | 1 (0.8)                     |
| Lost to follow-up                                            | 1 (0.8)                     |
| Other                                                        | 1 (0.8)                     |
| <b>Patients on treatment at time of data cutoff, n (%)</b>   | 18 (14.5)                   |
| <b>Relative dose intensity, median % (range)<sup>a</sup></b> | 98.6 (27.1–100)             |
| <b>Treatment exposure, median (range), months</b>            | 17.5 (0.1–65.3)             |

<sup>a</sup>Relative dose intensity is the ratio of the actual cumulative dose to the planned cumulative dose through the drug exposure period. AE, adverse event; SAE, serious adverse event.

**Supplemental Table 2. Most common AEs (reported in ≥10% of patients)**

| <b>All Patients (N=124)</b>     |                  |                |                |                |                |
|---------------------------------|------------------|----------------|----------------|----------------|----------------|
| <b>AE Preferred Term, n (%)</b> | <b>Any Grade</b> | <b>Grade 1</b> | <b>Grade 2</b> | <b>Grade 3</b> | <b>Grade 4</b> |
| <b>Headache</b>                 | 48 (39)          | 30 (24)        | 16 (13)        | 2 (2)          | 0              |
| <b>Diarrhea</b>                 | 47 (38)          | 25 (20)        | 17 (14)        | 5 (4)          | 0              |
| <b>Fatigue</b>                  | 37 (30)          | 26 (21)        | 8 (6)          | 2 (2)          | 0              |
| <b>Cough</b>                    | 29 (23)          | 24 (19)        | 5 (4)          | 0              | 0              |
| <b>Myalgia</b>                  | 27 (22)          | 19 (15)        | 6 (5)          | 2 (2)          | 0              |
| <b>Nausea</b>                   | 27 (22)          | 14 (11)        | 11 (9)         | 2 (2)          | 0              |
| <b>Asthenia</b>                 | 22 (18)          | 15 (12)        | 5 (4)          | 2 (2)          | 0              |
| <b>Constipation</b>             | 20 (16)          | 15 (12)        | 5 (4)          | 0              | 0              |
| <b>URTI</b>                     | 20 (16)          | 4 (3)          | 14 (11)        | 2 (2)          | 0              |
| <b>Dyspnea</b>                  | 19 (15)          | 13 (10)        | 3 (2)          | 2 (2)          | 1 (0.8)        |
| <b>Pyrexia</b>                  | 19 (15)          | 13 (10)        | 6 (5)          | 0              | 0              |
| <b>Vomiting</b>                 | 19 (15)          | 10 (8)         | 6 (5)          | 3 (2)          | 0              |
| <b>Anemia</b>                   | 18 (15)          | 1 (0.8)        | 3 (2)          | 12 (10)        | 2 (2)          |
| <b>Dizziness</b>                | 18 (15)          | 15 (12)        | 3 (2)          | 0              | 0              |
| <b>Rash</b>                     | 18 (15)          | 9 (7)          | 7 (6)          | 2 (2)          | 0              |
| <b>Contusion</b>                | 16 (13)          | 14 (11)        | 2 (2)          | 0              | 0              |
| <b>Sinusitis</b>                | 16 (13)          | 4 (3)          | 12 (10)        | 0              | 0              |
| <b>Abdominal pain</b>           | 15 (12)          | 5 (4)          | 8 (6)          | 2 (2)          | 0              |
| <b>Pneumonia</b>                | 15 (12)          | 1 (0.8)        | 5 (4)          | 9 (7)          | 0              |
| <b>Back pain</b>                | 14 (11)          | 11 (9)         | 3 (2)          | 0              | 0              |
| <b>Neutropenia</b>              | 14 (11)          | 0              | 0              | 7 (6)          | 7 (6)          |

|                   |         |       |       |   |   |
|-------------------|---------|-------|-------|---|---|
| <b>Arthralgia</b> | 13 (10) | 7 (6) | 6 (5) | 0 | 0 |
|-------------------|---------|-------|-------|---|---|

Four patients (3.2%) reported grade 5 treatment-emergent AEs (aortic stenosis, non-small cell lung cancer, pulmonary embolism, and suicide attempt; none were treatment related). AE, adverse event; URTI, upper respiratory tract infection.
